# Supplementary material for: Synthesis and biological evaluation of dual functionalized glutathione sensitive poly(ester-urethane) multiblock polymeric nanoparticles for cancer targeted drug delivery
Source: Royal Society of Chemistry journal article supplement (doi:10.1039/c5py00898k), 2015-01-01
Supplement: c5py00898k1.pdf [file c5py00898k1.pdf]

## Supporting Information

### **Synthesis and Biological Evaluation of Dual Functionalized Glutathione Sensitive Poly(Ester-Urethane) Multiblock Polymeric Nanoparticles for Cancer Targeted Drug Delivery**

*Arun Kumar,<sup>a,b</sup> Shantanu V. Lale,<sup>a,b</sup> Farhat Naz,<sup>c</sup> Veena Choudhary<sup>d</sup> and Veena Koul<sup>a,b\*</sup>*

<sup>a</sup> Centre for Biomedical Engineering, Indian Institute of Technology Delhi, New Delhi 110016, India

<sup>b</sup> Biomedical Engineering Unit, All India Institute of Medical Sciences (AIIMS), New Delhi 110029, India

<sup>c</sup> Department of Pathology, All India Institute of Medical Sciences (AIIMS), New Delhi 110029, India

<sup>d</sup> Centre for Polymer Science and Engineering, Indian Institute of Technology Delhi, New Delhi 110016, India

\*Corresponding author

Tel: +91 1126591041

E-mail: veenak\_iitd@yahoo.com

## <sup>1</sup>H NMR Tri block copolymer HO-PCL-PEG-PCL-OH

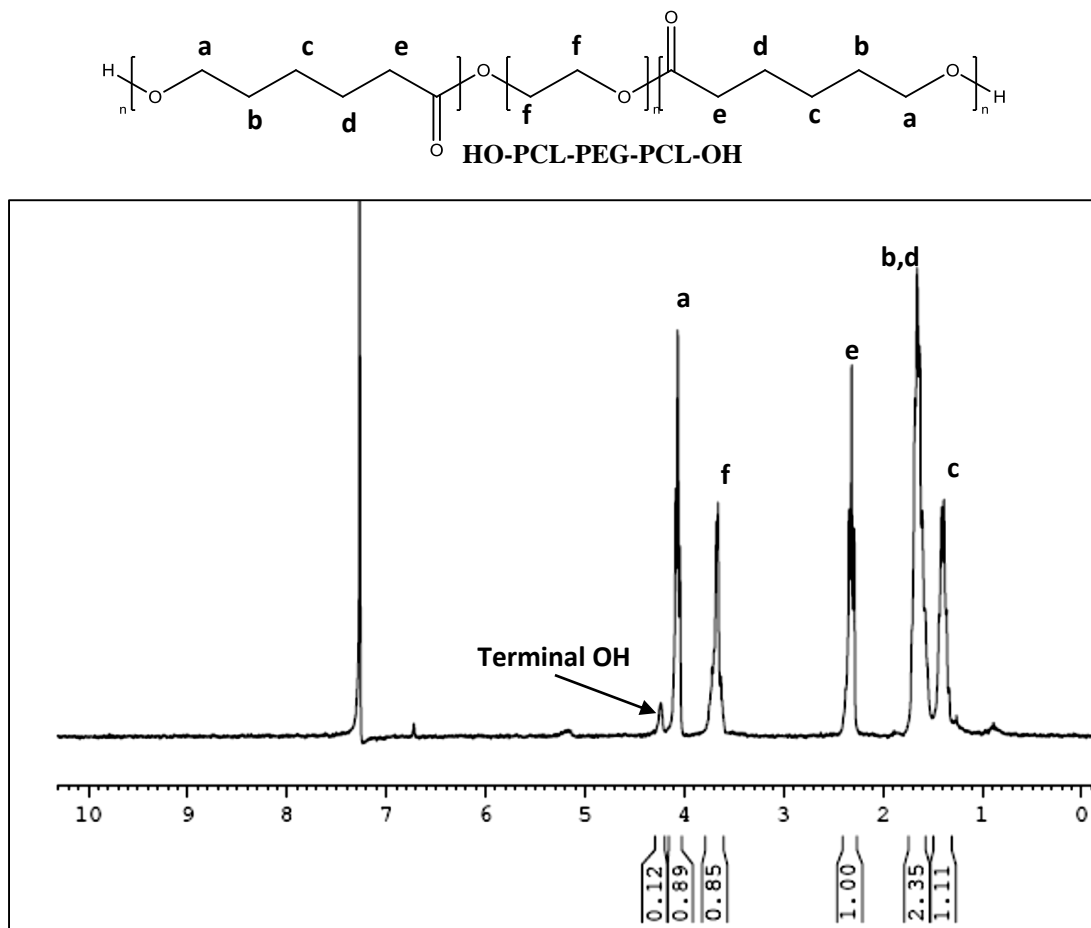

**Figure S1.** <sup>1</sup>H NMR Spectrum of HO-PCL-PEG-PCL-OH triblock copolymer

<sup>1</sup>H NMR (300 MHz, CDCl<sub>3</sub>, δ (ppm) – 1.34-1.41 (m, -OCH<sub>2</sub>CH<sub>2</sub>CH<sub>2</sub>CH<sub>2</sub>CH<sub>2</sub>CO-), 1.60-1.67 (m, OCH<sub>2</sub>CH<sub>2</sub>CH<sub>2</sub>CH<sub>2</sub>CH<sub>2</sub>CO-), 2.29-2.34 (t, OCH<sub>2</sub>CH<sub>2</sub>CH<sub>2</sub>CH<sub>2</sub>CH<sub>2</sub>CO-), 3.63-3.72 (-OCH<sub>2</sub>-CH<sub>2</sub>-O, PEG unit), 4.04-4.09 (t, -OCH<sub>2</sub>CH<sub>2</sub>CH<sub>2</sub>CH<sub>2</sub>CH<sub>2</sub>CO-), 4.24 (t, -CH<sub>2</sub>OH) terminal OH groups of polycaprolactone.

M<sub>n</sub> (GPC) = 1101 Da; molecular weight distribution (MWD) 1.24.

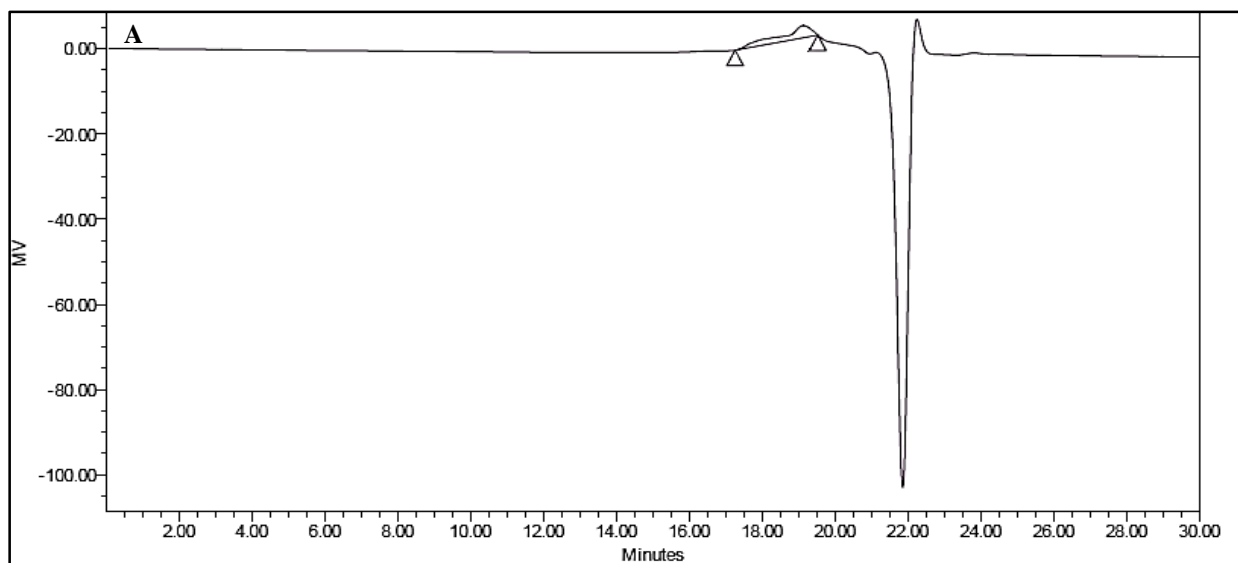

**Broad Unknown Relative Peak Table**

| Distribution Name | Mn (Daltons) | Mw (Daltons) | MP (Daltons) | Mz (Daltons) | Mz+1 (Daltons) | Polydispersity | Mz/Mw    | Mz+1/Mw  |
|-------------------|--------------|--------------|--------------|--------------|----------------|----------------|----------|----------|
| 1                 | 1101         | 1361         | 788          | 1674         | 1965           | 1.235663       | 1.230402 | 1.443983 |

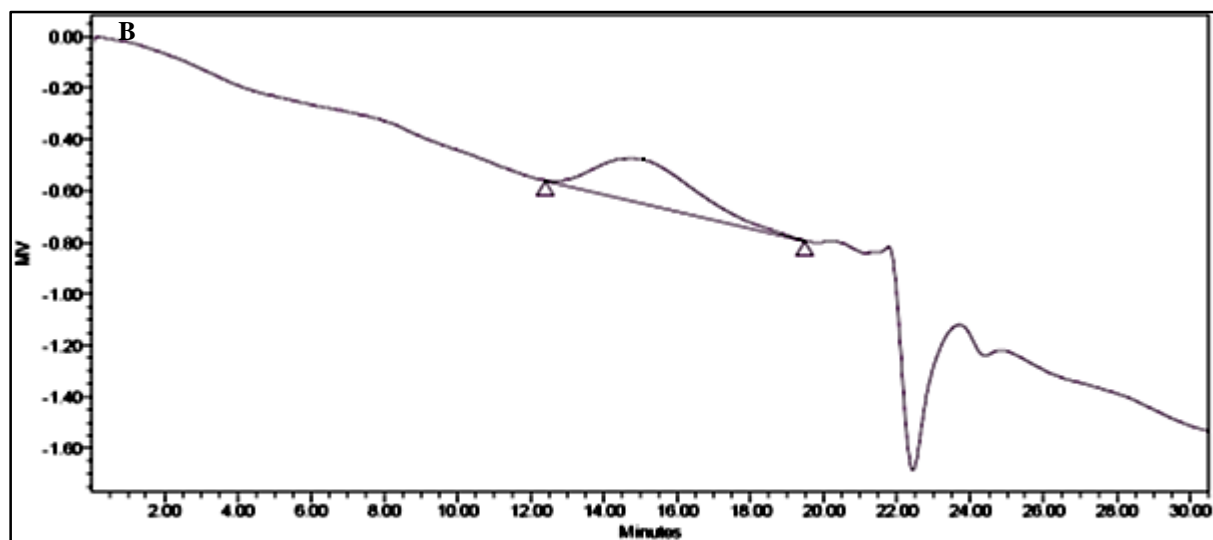

**Broad Unknown Relative Peak Table**

| Distribution Name | Mn (Daltons) | Mw (Daltons) | MP (Daltons) | Mz (Daltons) | Mz+1 (Daltons) | Polydispersity | Mz/Mw    | Mz+1/Mw  |
|-------------------|--------------|--------------|--------------|--------------|----------------|----------------|----------|----------|
| 1                 | 7780         | 13033        | 12902        | 20080        | 25787          | 1.788772       | 1.441197 | 1.850855 |

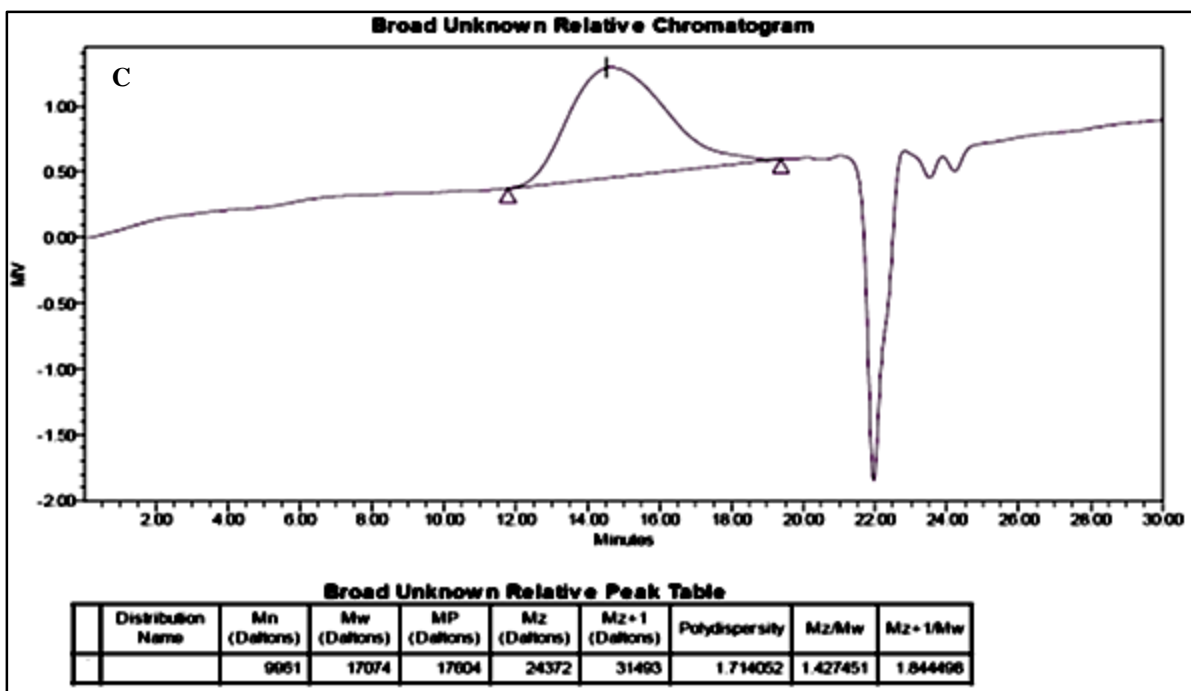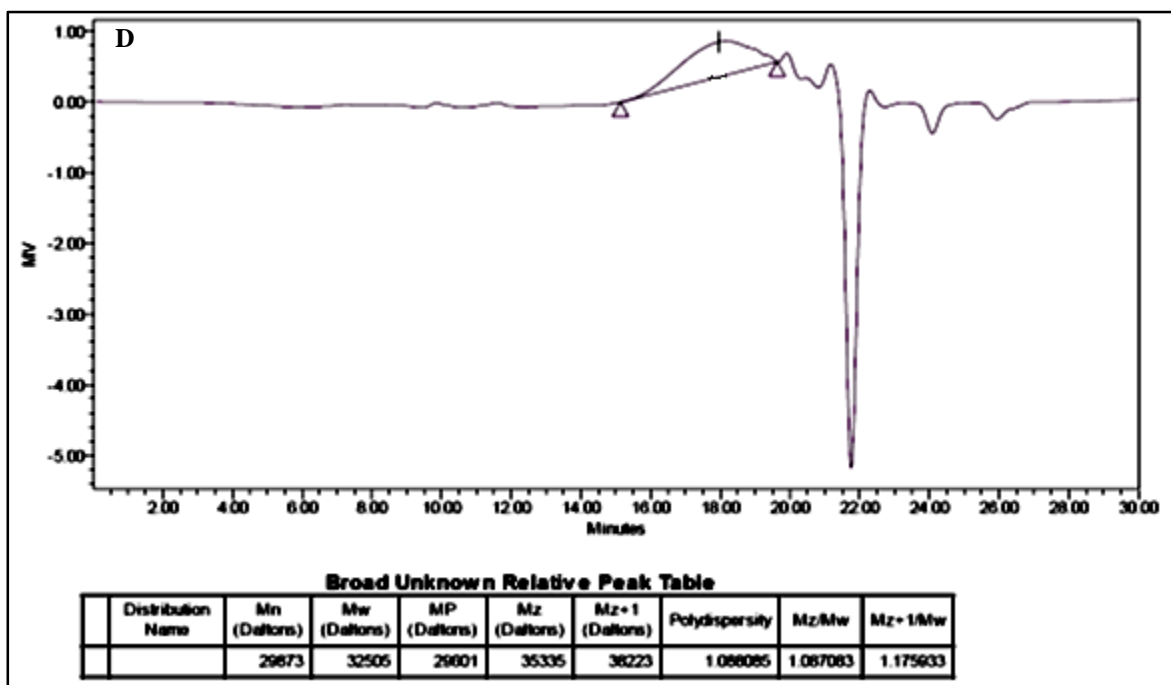

**Figure S2.** GPC data of (A) triblock copolymer, (B) multiblock copolymer (MB-30-ss-PCL) (C) multiblock copolymer (MB-50-ss-PCL), (D) multiblock copolymer (MB-70-ss-PCL)

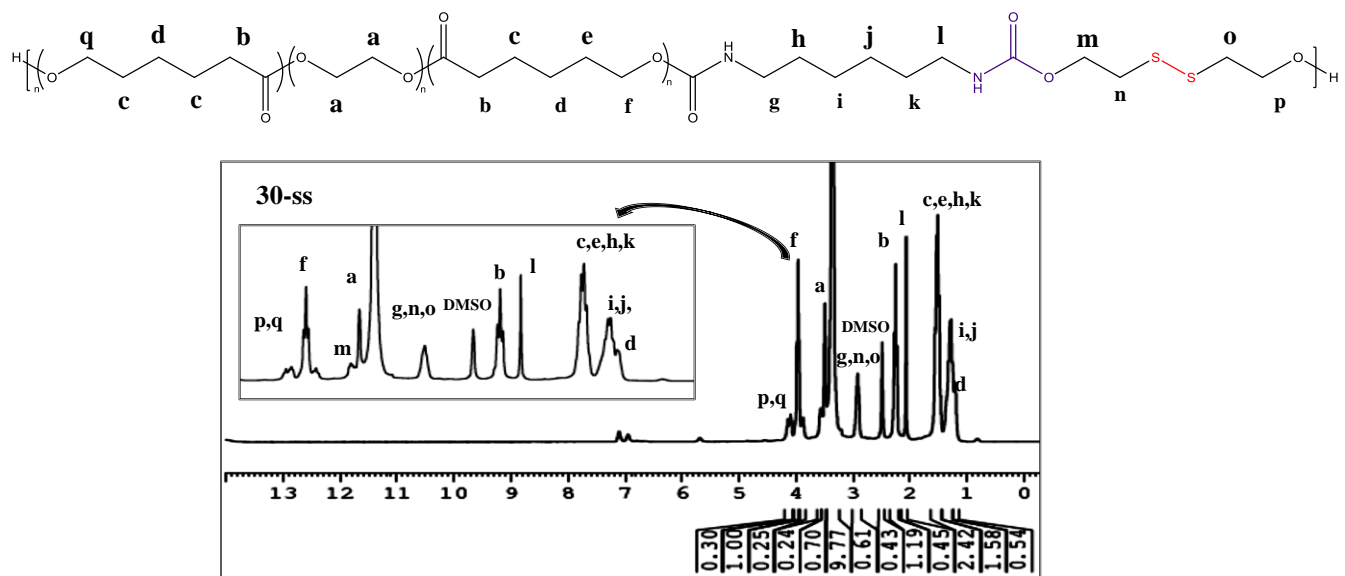

**Figure S3A.** <sup>1</sup>H NMR Spectrum of multiblock copolymer based on PCL-PEG-PCL

<sup>1</sup>H NMR (300 MHz, DMSO,  $\delta$  (ppm)) – 1.32-1.30 (m,  $-\text{OCH}_2\text{CH}_2\text{CH}_2\text{CH}_2\text{CH}_2\text{CO}-$  and  $(-\text{HN}-\text{CH}_2\text{CH}_2\text{CH}_2\text{CH}_2\text{CH}_2\text{CH}_2-\text{NH}-)$  of hexamethylene group), 1.49-1.56 (m,  $\text{OCH}_2\text{CH}_2\text{CH}_2\text{CH}_2\text{CH}_2\text{CO}-$ ), 2.07 ( $-\text{HN}-\text{CH}_2\text{CH}_2\text{CH}_2\text{CH}_2\text{CH}_2-\text{NH}-$  of hexamethylene group), 2.23-2.28 (t,  $\text{OCH}_2\text{CH}_2\text{CH}_2\text{CH}_2\text{CH}_2\text{CO}-$ ) of polycaprolactone, 2.92 (m,  $-\text{CH}_2\text{CH}_2-\text{SS}-\text{CH}_2\text{CH}_2-$ ) and  $(-\text{HN}-\text{CH}_2\text{CH}_2\text{CH}_2\text{CH}_2\text{CH}_2\text{CH}_2-\text{NH}-$  of hexamethylene group), 3.49 ( $-\text{OCH}_2-\text{CH}_2-\text{O}$ , PEG unit), 3.95 (t,  $(-\text{O}-\text{CH}_2\text{CH}_2-\text{SS}-\text{CH}_2\text{CH}_2-\text{O}-)$  of 2-hydroxyethyl sulphide, 3.95-3.97 (t,  $\text{OCH}_2\text{CH}_2\text{CH}_2\text{CH}_2\text{CH}_2\text{CO}-$ ) of polycaprolactone, 4.12-4.18 (t,  $-\text{CH}_2\text{OH}$ ) terminal OH groups of polycaprolactone.

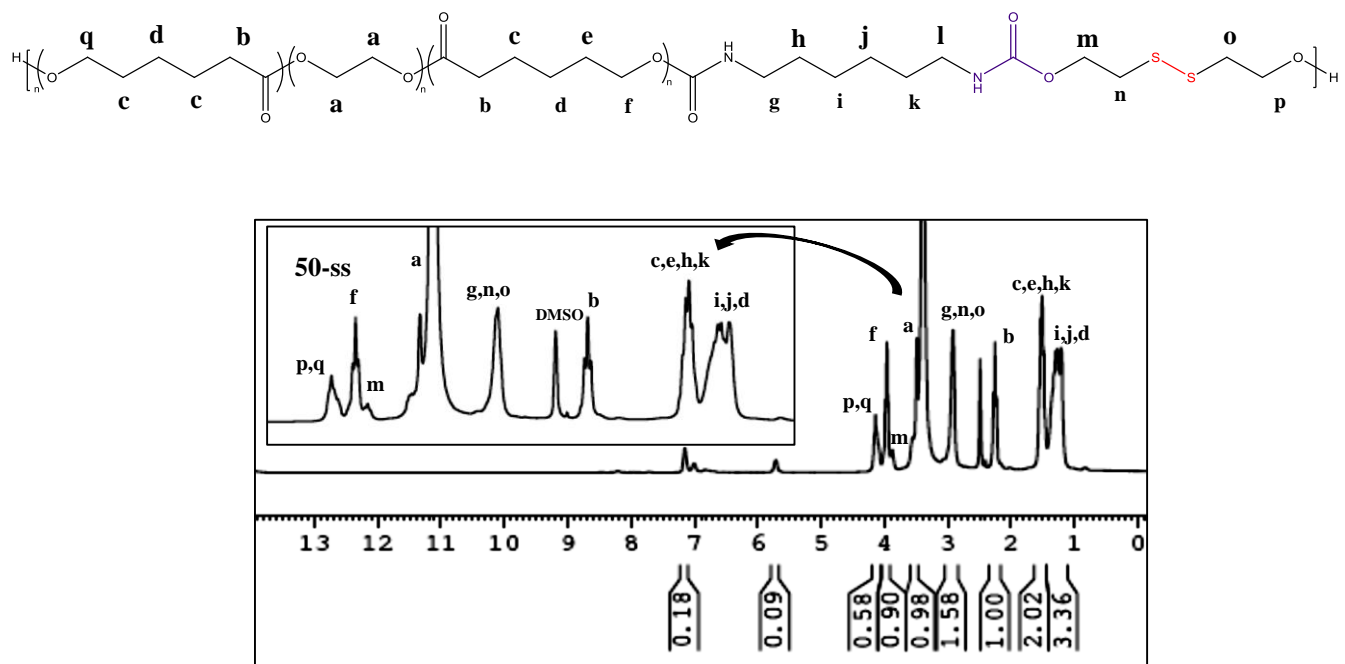

**Figure S3B.** <sup>1</sup>H NMR Spectrum of multiblock copolymer based on PCL-PEG-PCL

<sup>1</sup>H NMR (300 MHz, DMSO,  $\delta$  (ppm)) – 1.32-1.30 (m, -OCH<sub>2</sub>CH<sub>2</sub>**CH**<sub>2</sub>CH<sub>2</sub>CH<sub>2</sub>CO- and (-HN-CH<sub>2</sub>CH<sub>2</sub>**CH**<sub>2</sub>CH<sub>2</sub>CH<sub>2</sub>CH<sub>2</sub>-NH-) of hexamethylene group), 1.49-1.56 (m, OCH<sub>2</sub>**CH**<sub>2</sub>CH<sub>2</sub>**CH**<sub>2</sub>CH<sub>2</sub>CO-), 2.07 (-HN-CH<sub>2</sub>**CH**<sub>2</sub>CH<sub>2</sub>CH<sub>2</sub>**CH**<sub>2</sub>CH<sub>2</sub>-NH- of hexamethylene group), 2.23-2.28 (t, OCH<sub>2</sub>CH<sub>2</sub>CH<sub>2</sub>CH<sub>2</sub>**CH**<sub>2</sub>CO-) of polycaprolactone, 2.92 (m, -CH<sub>2</sub>**CH**<sub>2</sub>-SS-**CH**<sub>2</sub>CH<sub>2</sub>-) and (-HN-**CH**<sub>2</sub>CH<sub>2</sub>CH<sub>2</sub>CH<sub>2</sub>CH<sub>2</sub>**CH**<sub>2</sub>-NH- of hexamethylene group), 3.49 (-OCH<sub>2</sub>-CH<sub>2</sub>-O, PEG unit), 3.95 (t, (-O-**CH**<sub>2</sub>CH<sub>2</sub>-SS-CH<sub>2</sub>**CH**<sub>2</sub>-O-) of 2-hydroxyethyl sulphide, 3.95-3.97 (t, O**CH**<sub>2</sub>CH<sub>2</sub>CH<sub>2</sub>CH<sub>2</sub>CH<sub>2</sub>CO-) of polycaprolactone, 4.12-4.18 (t, -**CH**<sub>2</sub>OH) terminal OH groups of polycaprolactone.

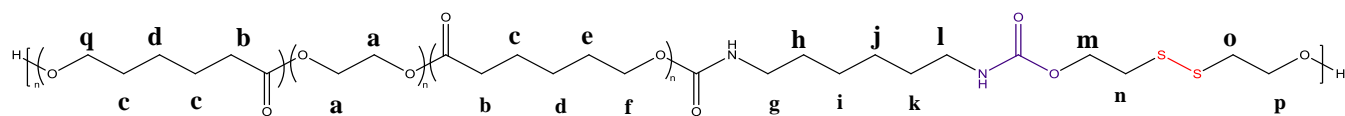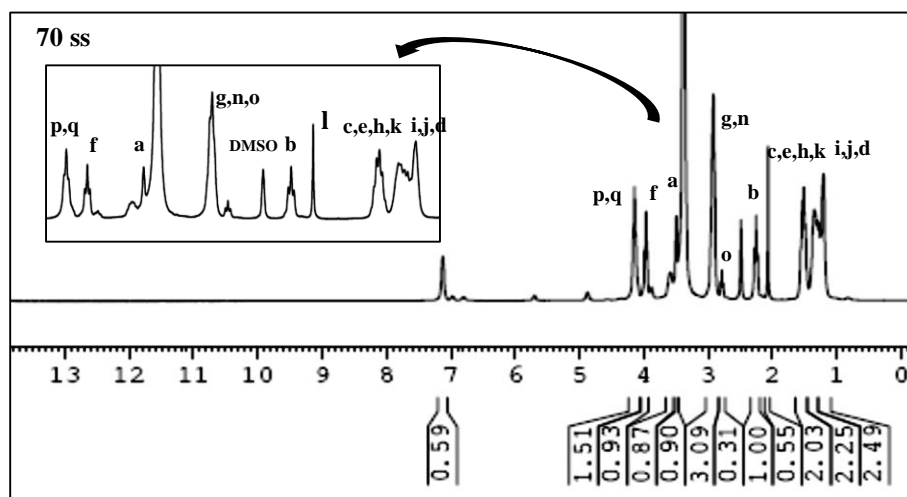

**Figure S3C.** <sup>1</sup>H NMR Spectrum of multiblock copolymer based on PCL-PEG-PCL

<sup>1</sup>H NMR (300 MHz, DMSO, δ (ppm)) – 1.32-1.30 (m, -OCH<sub>2</sub>CH<sub>2</sub>CH<sub>2</sub>CH<sub>2</sub>CH<sub>2</sub>CO- and (-HN-CH<sub>2</sub>CH<sub>2</sub>CH<sub>2</sub>CH<sub>2</sub>CH<sub>2</sub>-NH-) of hexamethylene group), 1.49-1.56 (m, OCH<sub>2</sub>CH<sub>2</sub>CH<sub>2</sub>CH<sub>2</sub>CH<sub>2</sub>CO-), 2.07 (-HN-CH<sub>2</sub>CH<sub>2</sub>CH<sub>2</sub>CH<sub>2</sub>CH<sub>2</sub>-NH- of hexamethylene group), 2.23-2.28 (t, OCH<sub>2</sub>CH<sub>2</sub>CH<sub>2</sub>CH<sub>2</sub>CH<sub>2</sub>CO-) of polycaprolactone, 2.92 (m, -CH<sub>2</sub>CH<sub>2</sub>-SS-CH<sub>2</sub>CH<sub>2</sub>-) and (-HN-CH<sub>2</sub>CH<sub>2</sub>CH<sub>2</sub>CH<sub>2</sub>CH<sub>2</sub>CH<sub>2</sub>-NH- of hexamethylene group), 3.49 (-OCH<sub>2</sub>-CH<sub>2</sub>-O, PEG unit), 3.95 (t, (-O-CH<sub>2</sub>CH<sub>2</sub>-SS-CH<sub>2</sub>CH<sub>2</sub>-O-) of 2-hydroxyethyl sulphide, 3.95-3.97 (t, OCH<sub>2</sub>CH<sub>2</sub>CH<sub>2</sub>CH<sub>2</sub>CH<sub>2</sub>CO-) of polycaprolactone, 4.12-4.18 (t, -CH<sub>2</sub>OH) terminal OH groups of polycaprolactone.

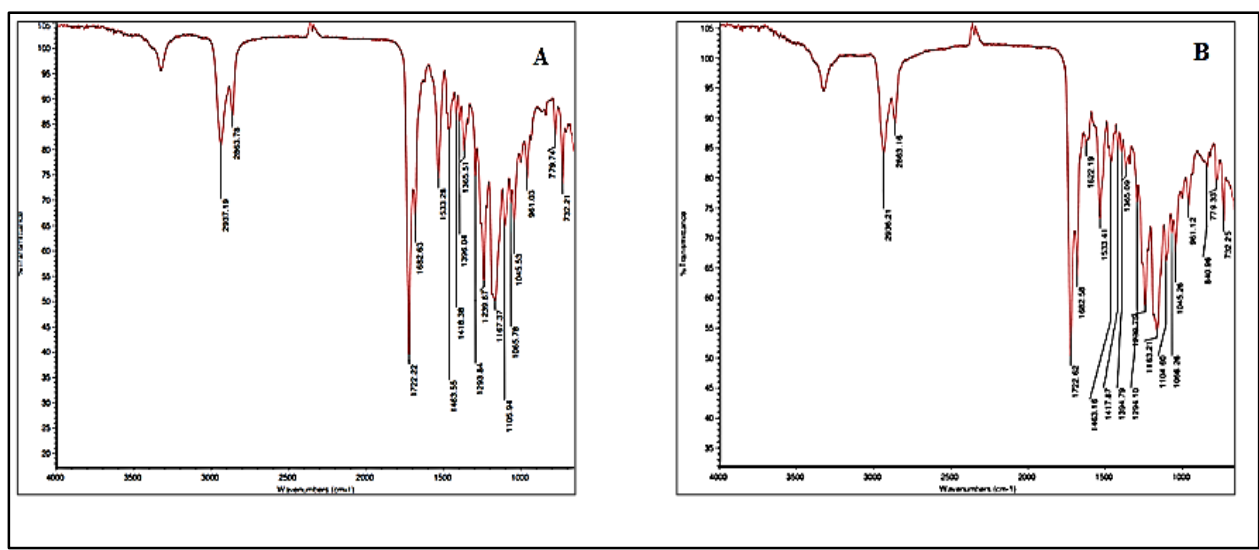

**Figure S4.** FTIR spectrum of (A) multiblock copolymer and (B) folate conjugated multiblock copolymer



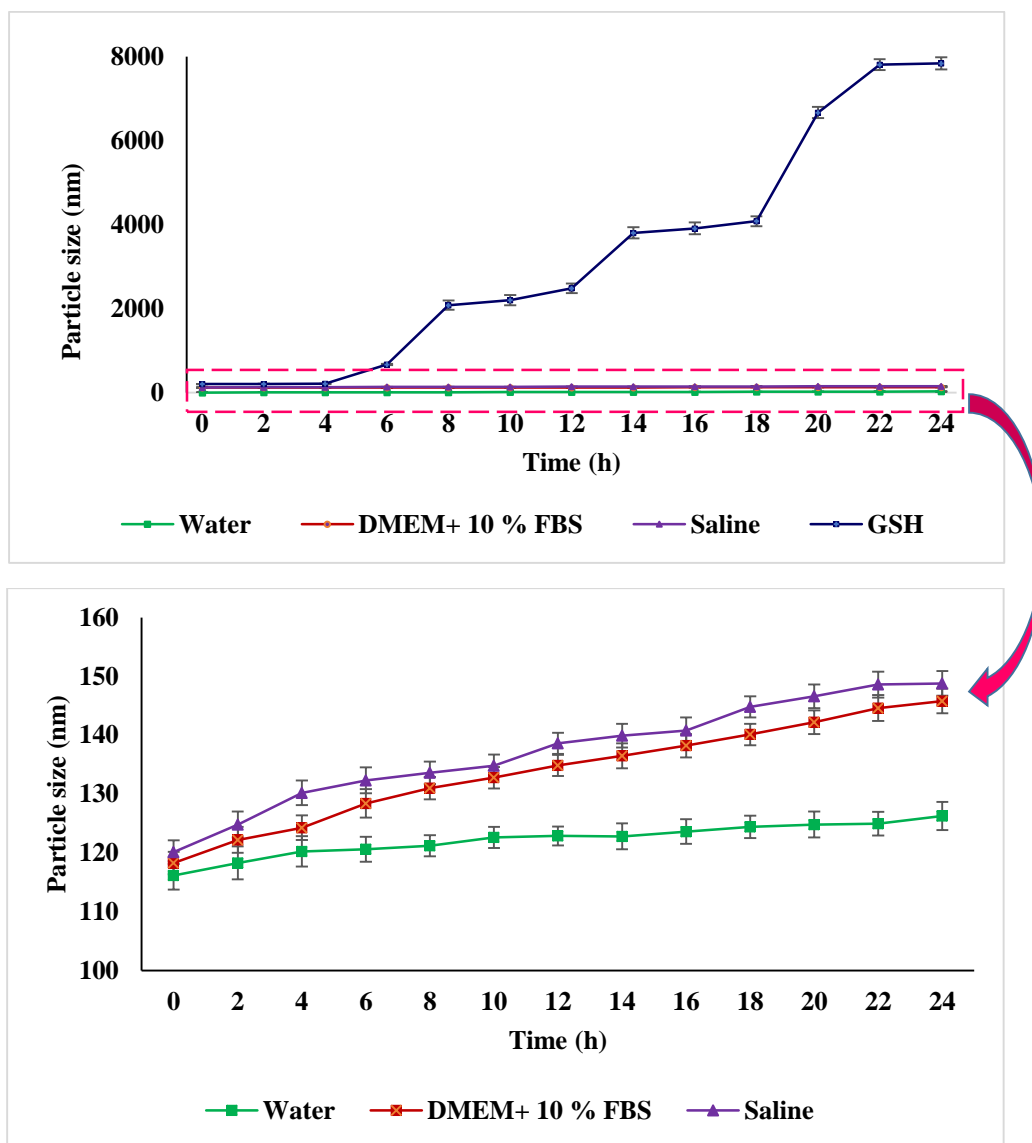

**Figure S5.** Colloidal stability of polymeric nanoparticles (MB-30-ss-FA-NPs)

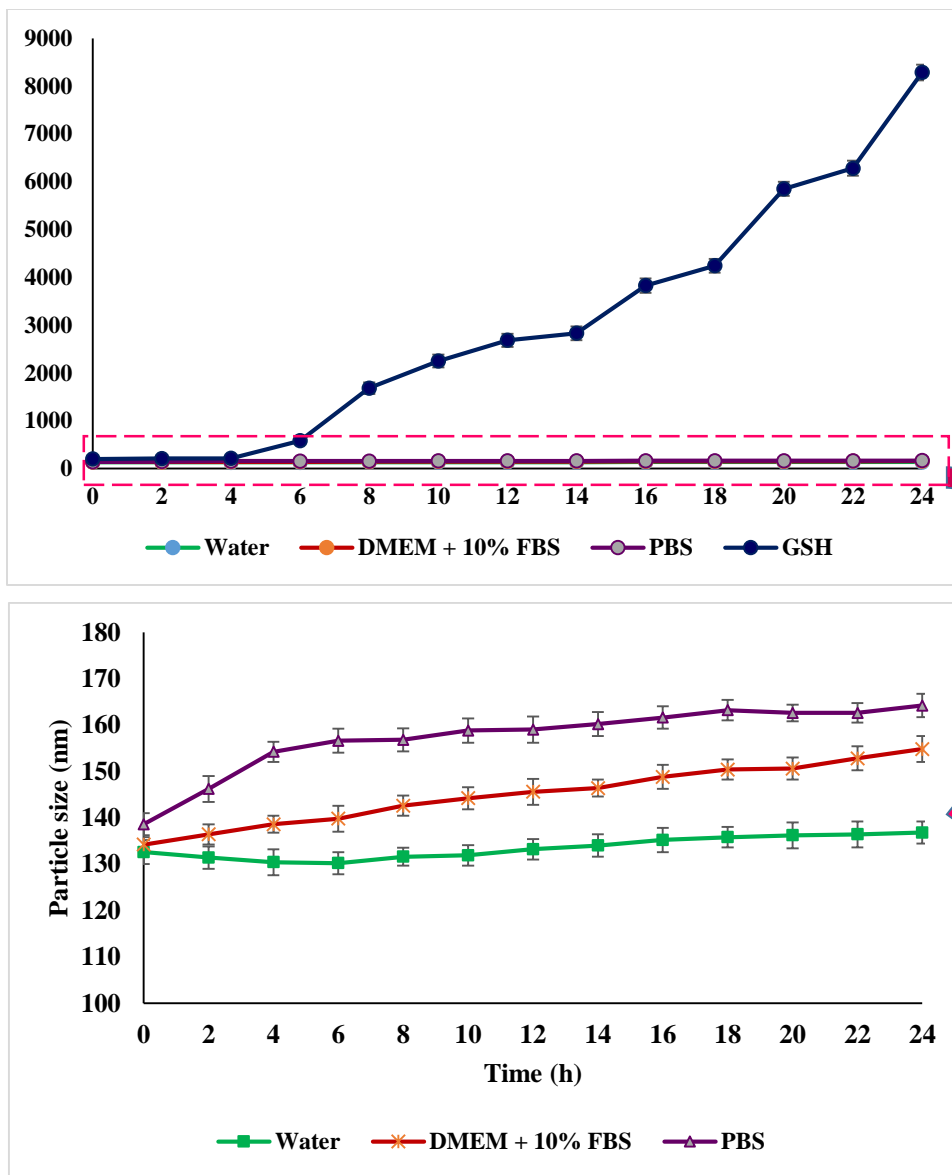

**Figure S6.** Colloidal stability of polymeric nanoparticles (MB-30-ss-FA-Her-Dox-NPs)

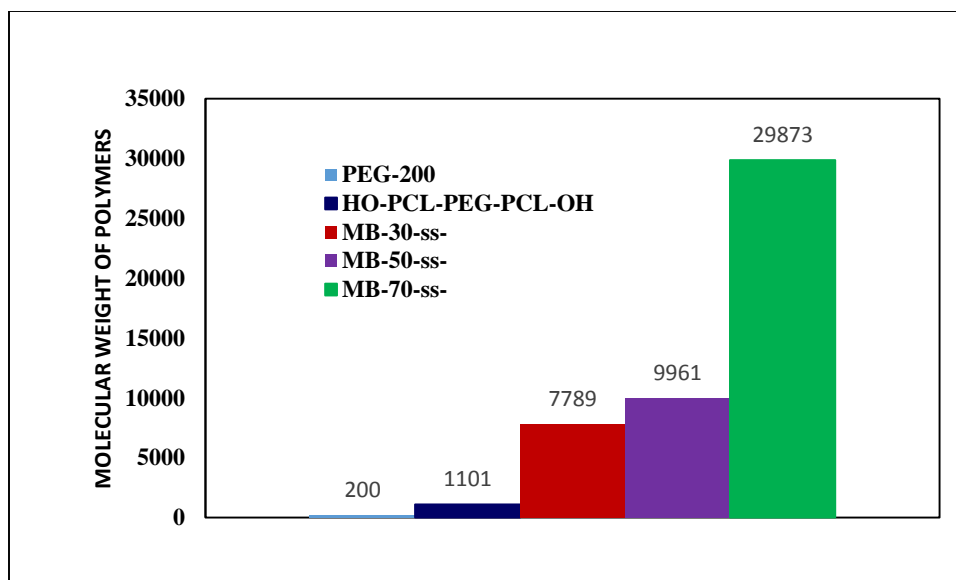

**Figure S7.** Comparison of molecular weights of PEG, triblock copolymer and multiblock copolymers

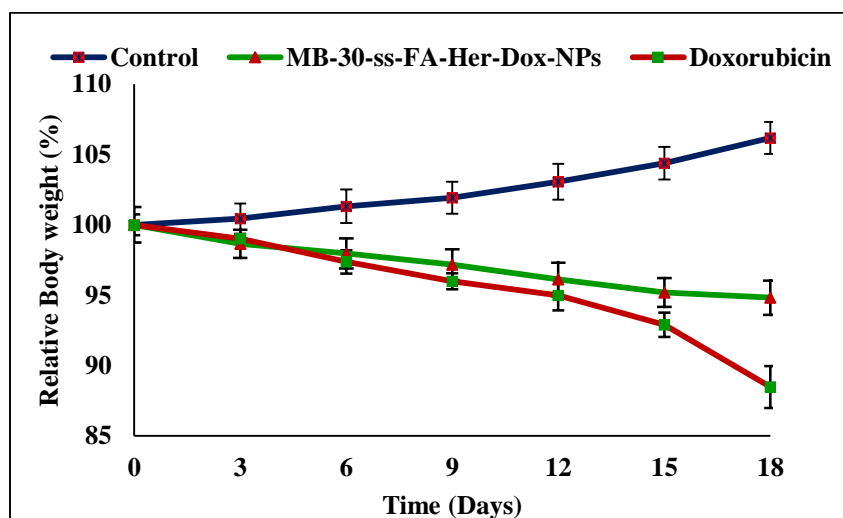

**Figure S8.** Relative body weight of EAT bearing Swiss albino mice during the treatment (mean  $\pm$  SD, n=6)
